# Supplementary material for: Isomeric and rotational effects in the chemi-ionisation of 1,2-dibromoethene with metastable neon atoms
Source: Royal Society of Chemistry journal article supplement (doi:10.1039/d3fd00172e), 2024-01-01

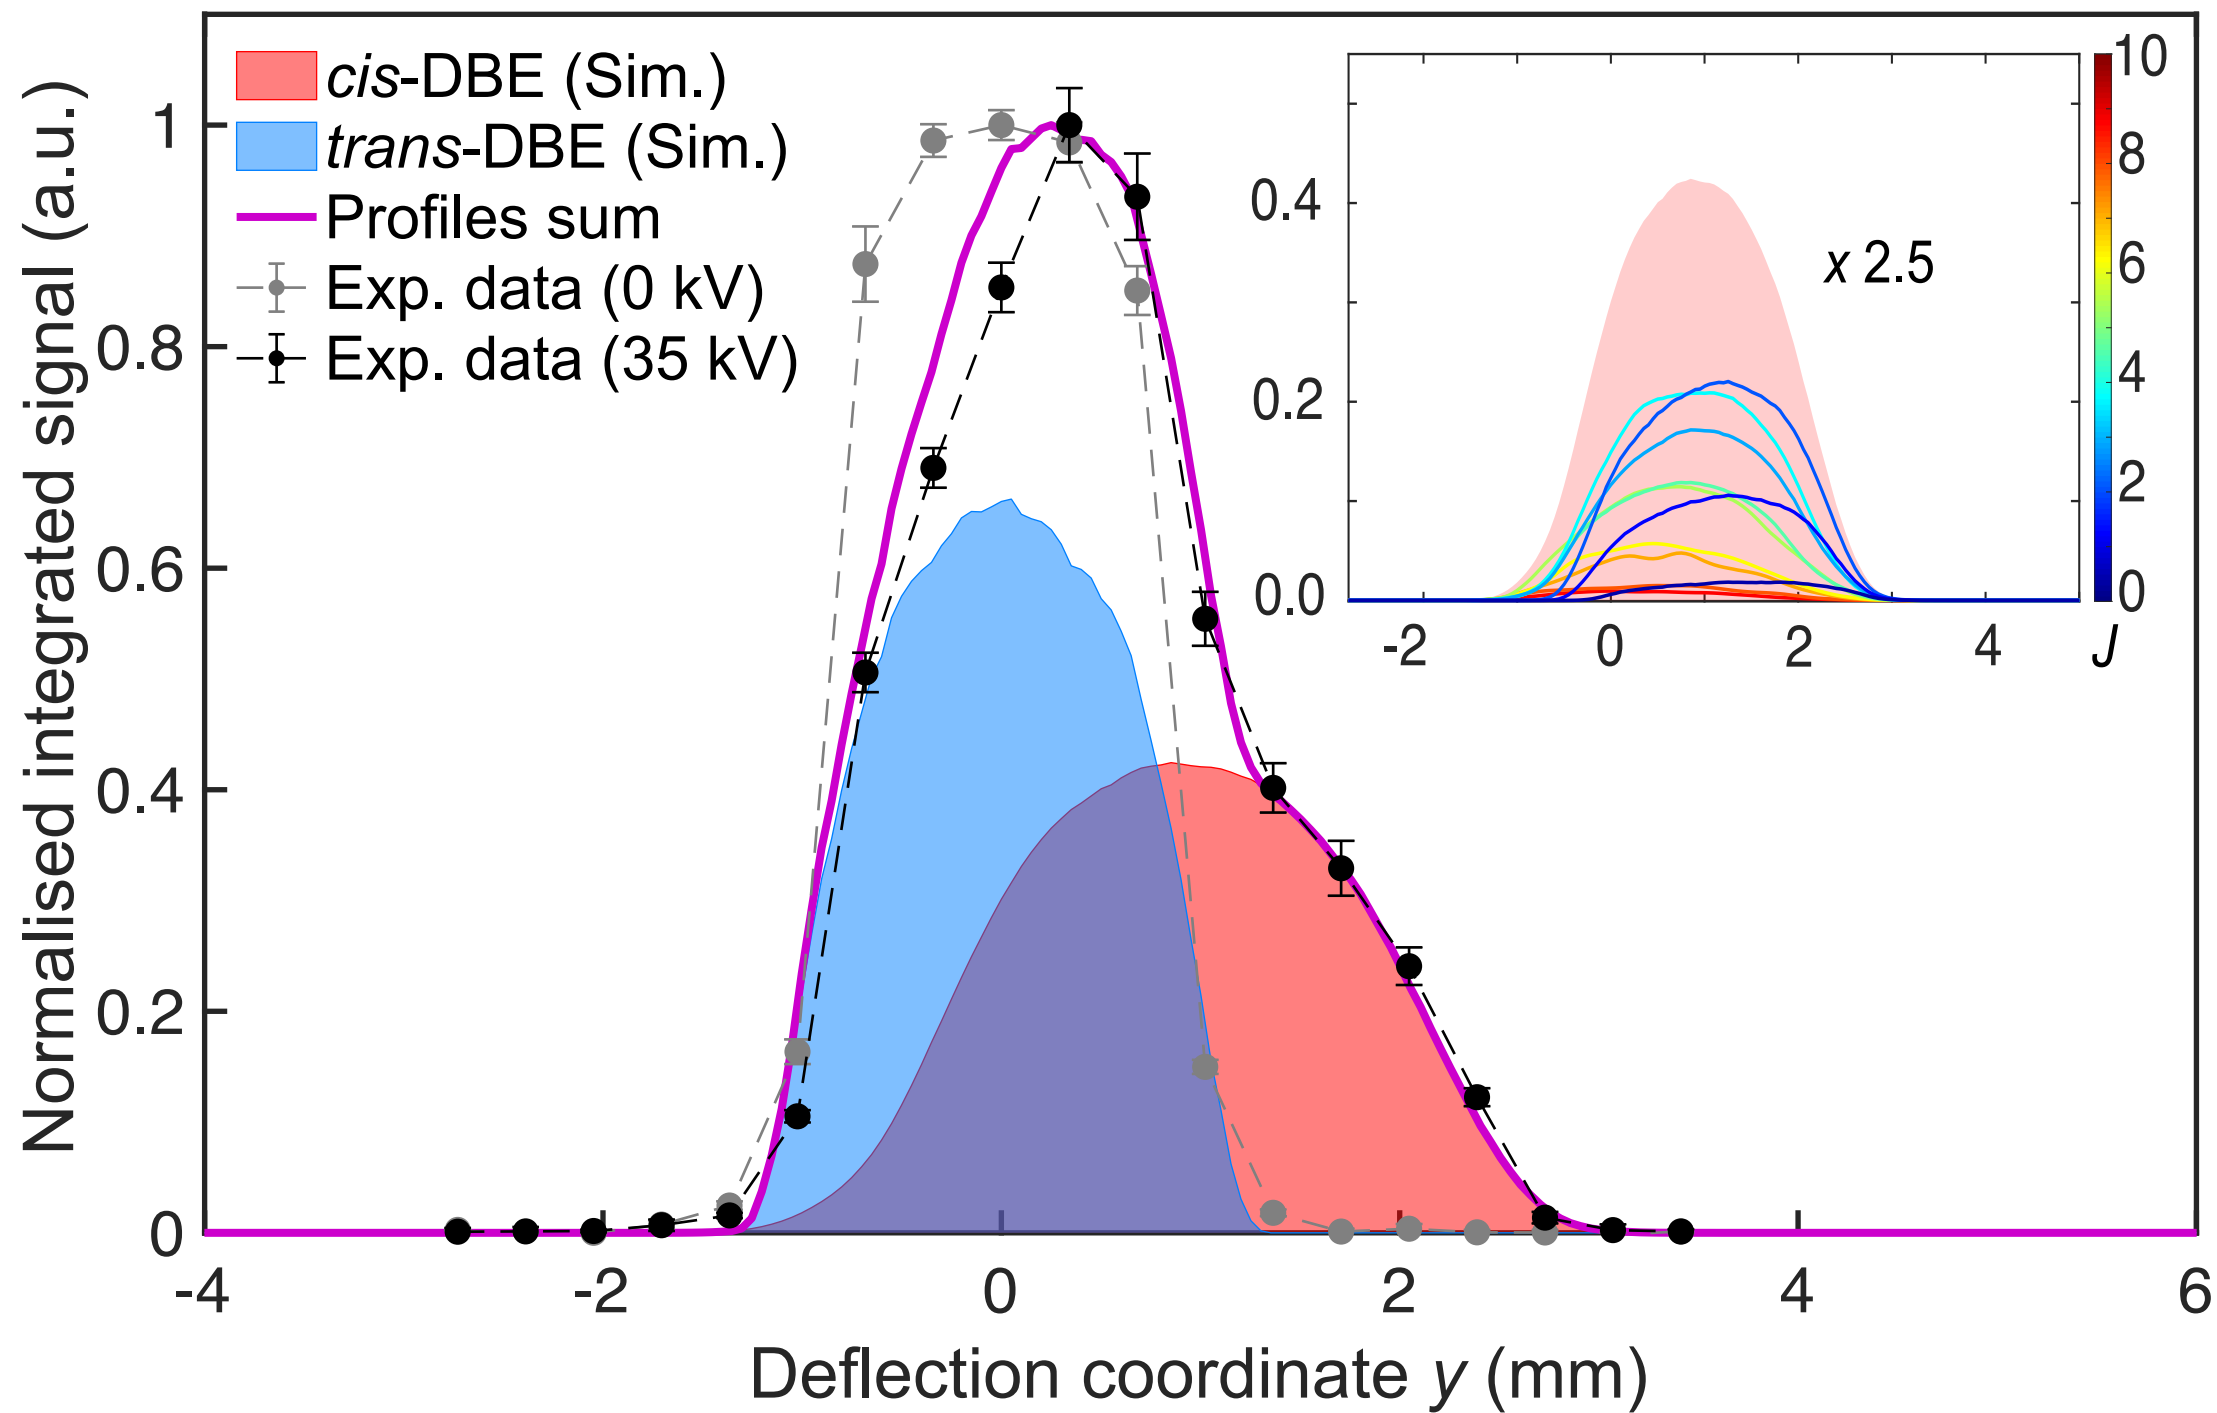

Supplement: d3fd00172e1.pdf [file d3fd00172e1.pdf]
