# Supplementary material for: Isomeric and rotational effects in the chemi-ionisation of 1,2-dibromoethene with metastable neon atoms
Source: Royal Society of Chemistry journal article supplement (doi:10.1039/d3fd00172e), 2024-01-01
Supplement: d3fd00172e3.pdf [file d3fd00172e3.pdf]

## Supplementary Information for

# Isomeric and rotational effects in the chemi-ionisation of 1,2-dibromoethene with metastable neon atoms

Amit Mishra,<sup>a</sup> Junggil Kim,<sup>b</sup> Sang Kyu Kim,<sup>\*b</sup>, and Stefan Willitsch<sup>\*a</sup>

<sup>a</sup> *Department of Chemistry, University of Basel, Klingelbergstrasse 80, 4056, Basel, Switzerland.*

<sup>b</sup> *Department of Chemistry, KAIST, Daejeon 34141, Republic of Korea.*

*\*E-mail: stefan.willitsch@unibas.ch (S.W.), skkim1230@kaist.ac.kr (S.K.K.)*

| State    | Symmetry  | Configuration                               | MP2   | CASPT2 | Expt. [32] | Expt. [38] |
|----------|-----------|---------------------------------------------|-------|--------|------------|------------|
| $D_0$    | ${}^2B_1$ | $(\pi_3)^{-1}$                              | 9.64  | 9.34   | 9.44       | 9.63       |
| $D_1$    | ${}^2B_2$ | $(n_2)^{-1}$                                | 10.69 | 10.39  | 10.74      | 10.74      |
| $D_2$    | ${}^2A_1$ | $(n_1)^{-1}$                                | 11.38 | 11.08  | 11.24      | 11.23      |
| $D_3$    | ${}^2A_2$ | $(\pi_2)^{-1}$                              | 11.51 | 11.21  | 11.56      | 11.53      |
| $D_4$    | ${}^2B_1$ | $(\pi_1)^{-1}$                              | 13.05 | 12.75  | 12.85      | 12.86      |
| $D_5$    | ${}^2B_2$ | $(\sigma_2)^{-1}$                           | 13.72 | 13.42  | 13.27      | 13.22      |
| $D_6$    | ${}^2A_2$ | $(\pi_3)^{-2}(\pi_1^*)^1$                   | 14.37 | 14.07  | -          | -          |
| $D_7$    | ${}^2A_1$ | $(n_2)^{-1}(\pi_3)^{-1}(\pi_1^*)^1$         | 14.76 | 14.46  | -          | -          |
| $D_8$    | ${}^2A_1$ | $(\sigma_2)^{-1}(\pi_3)^{-1}(\sigma_1^*)^1$ | 14.80 | 14.50  | -          | -          |
| $D_9$    | ${}^2A_1$ | $(\sigma_1)^{-1}$                           | 14.93 | 14.63  | 14.80      | 14.83      |
| $D_{10}$ | ${}^2A_2$ | $(n_2)^{-1}(\pi_3)^{-1}(\sigma_1^*)^1$      | 15.27 | 14.98  | -          | -          |
| $D_{11}$ | ${}^2B_2$ | $(n_1)^{-1}(\pi_3)^{-1}(\pi_1^*)^1$         | 15.40 | 15.11  | -          | -          |
| $D_{12}$ | ${}^2B_1$ | $(n_1)^{-1}(\pi_3)^{-1}(\sigma_1^*)^1$      | 15.64 | 15.34  | -          | -          |

Table S1: Vertical excitation energies (VEE) in eV and dominant electron configurations of electronically excited states of *cis*-DBE<sup>+</sup>. The VEEs were calculated at the MP2 and CASPT2 levels of theory and are compared with experimental results. All energies are referenced to the S<sub>0</sub> electronic ground state of the neutral.

| State    | Symmetry  | Configuration                          | MP2   | CASPT2 | Expt. [32] | Expt. [38] |
|----------|-----------|----------------------------------------|-------|--------|------------|------------|
| $D_0$    | ${}^2A_u$ | $(\pi_3)^{-1}$                         | 9.57  | 9.22   | 9.44       | 9.55       |
| $D_1$    | ${}^2A_g$ | $(n_2)^{-1}$                           | 11.08 | 10.73  | 11.05      | 11.04      |
| $D_2$    | ${}^2B_u$ | $(n_1)^{-1}$                           | 11.08 | 10.73  | 11.05      | 11.04      |
| $D_3$    | ${}^2B_g$ | $(\pi_2)^{-1}$                         | 11.62 | 11.27  | 11.60      | 11.57      |
| $D_4$    | ${}^2A_u$ | $(\pi_1)^{-1}$                         | 13.05 | 12.69  | 13.0       | 12.90      |
| $D_5$    | ${}^2A_g$ | $(\sigma_2)^{-1}$                      | 13.45 | 13.10  | 13.00      | 13.30      |
| $D_6$    | ${}^2B_g$ | $(\pi_3)^{-2}(\pi_1^*)^1$              | 14.19 | 13.83  | -          | -          |
| $D_7$    | ${}^2B_u$ | $(\pi_3)^{-2}(\sigma_1^*)^1$           | 14.52 | 14.17  | -          | -          |
| $D_8$    | ${}^2A_g$ | $(n_1)^{-1}(\pi_3)^{-1}(\pi_1^*)^1$    | 15.05 | 14.70  | -          | -          |
| $D_9$    | ${}^2B_u$ | $(n_2)^{-1}(\pi_3)^{-1}(\pi_1^*)^1$    | 15.06 | 14.70  | -          | -          |
| $D_{10}$ | ${}^2B_g$ | $(n_2)^{-1}(\pi_3)^{-1}(\sigma_1^*)^1$ | 15.26 | 14.90  | -          | -          |
| $D_{11}$ | ${}^2A_u$ | $(n_1)^{-1}(\pi_3)^{-1}(\sigma_1^*)^1$ | 15.26 | 14.91  | -          | -          |
| $D_{12}$ | ${}^2A_u$ | mixed                                  | 15.69 | 15.34  | -          | -          |
| $D_{13}$ | ${}^2B_g$ | mixed                                  | 15.70 | 15.35  | -          | -          |
| $D_{14}$ | ${}^2B_u$ | $(\sigma_1)^{-1}$                      | 15.76 | 15.41  | 15.90      | 15.50      |
| $D_{15}$ | ${}^2A_g$ | mixed                                  | 15.83 | 15.48  | -          | -          |

Table S2: Vertical excitation energies (VEE, in eV) and dominant electron configurations of electronically excited states of *trans*-DBE<sup>+</sup>. The VEEs were calculated at the MP2 and CASPT2 levels of theory and are compared with experimental results. All energies are referenced to the S<sub>0</sub> electronic ground state of the neutral.

| Product channel      | <i>cis</i> -DBE |        | <i>trans</i> -DBE |        |
|----------------------|-----------------|--------|-------------------|--------|
|                      | MP2             | CASPT2 | MP2               | CASPT2 |
| $C_2H_2 + Br_2$      | 1.89            | 1.86   | 1.87              | 1.80   |
| $C_2H_2 + Br + Br$   | 4.18            | 3.98   | 4.16              | 3.92   |
| $C_2H_2Br + Br$      | 4.20            | 3.62   | 4.12              | 3.48   |
| $C_2H_2Br_2^+$       | 9.52            | 9.22   | 9.46              | 9.11   |
| $C_2H_2Br^+ + Br$    | 12.15           | 11.98  | 12.14             | 11.91  |
| $C_2H_2 + Br_2^+$    | 12.48           | 12.15  | 12.47             | 12.08  |
| $C_2H_2^+ + Br_2$    | 13.37           | 13.10  | 13.35             | 13.04  |
| $C_2H_2^+ + Br + Br$ | 15.67           | 15.23  | 15.65             | 15.17  |
| $C_2H_2 + Br + Br^+$ | 15.84           | 15.44  | 15.82             | 15.38  |
| $C_2H_2Br + Br^+$    | 15.86           | 15.08  | 15.79             | 14.94  |

Table S3: Calculated appearance energies (AE) of different dissociation products. All energies are referenced to the  $S_0$  electronic ground state of the neutral.

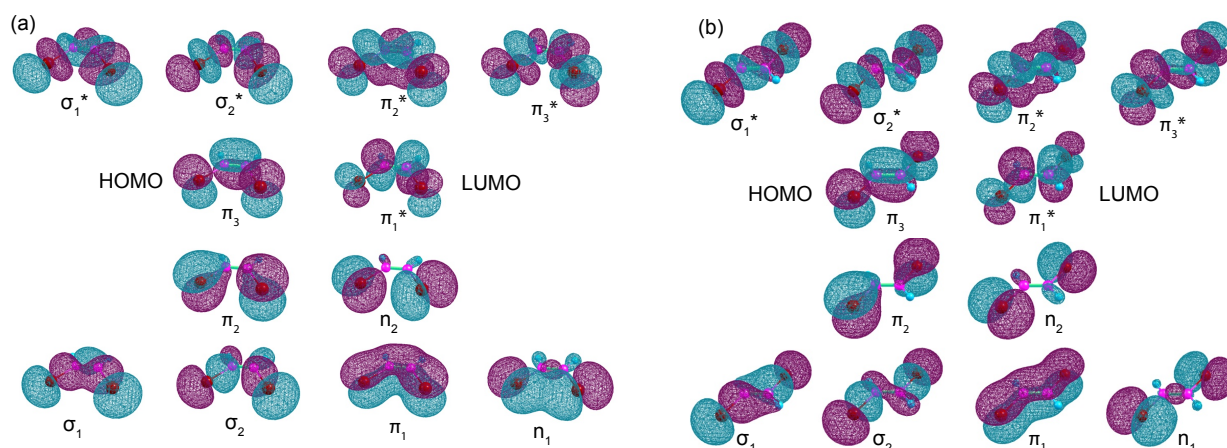

Figure S1: Relevant molecular orbitals of (a) *cis*- and (b) *trans*-dibromoethene calculated at the CASSCF level of theory.

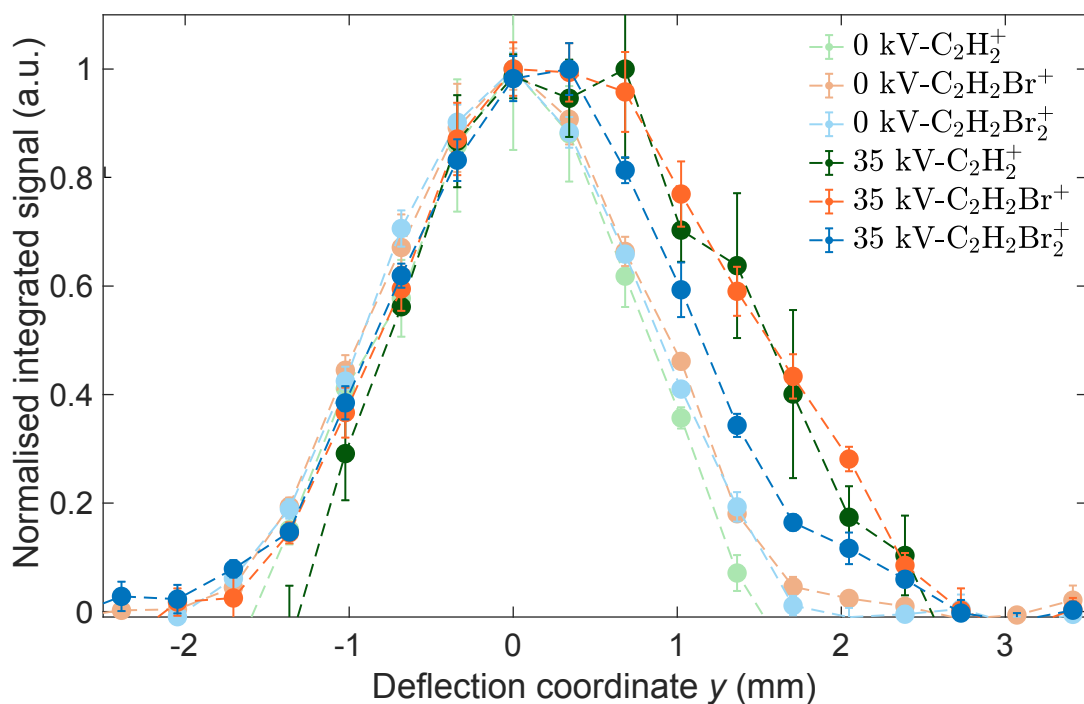

Figure S2: Normalised deflection profiles of the chemiionisation reaction of a 1:1 mixture of *cis-/trans*-dibromoethene with  $\text{Ne}^*$  recorded for Penning-ionisation (PI, blue) and dissociative-ionisation (DI, green and orange) products at 0 kV (light symbols) and 35 kV (dark symbols) deflector voltages.
